# Supplementary material for: Comorbidities, Cardiovascular Therapies, and COVID-19 Mortality: A Nationwide, Italian Observational Study (ItaliCO)
Source: Front Cardiovasc Med. 2020 Oct 9;7:585866. doi: 10.3389/fcvm.2020.585866 (PMC7583635; doi:10.3389/fcvm.2020.585866)
Supplement: Supplementary file 2 [file Data_Sheet_1.DOCX]

**ItaliCO: Italian national study on risk factors associated with COVID-19**

**List of Contributors:**

F. Polverino MD PhD1, D. Stern MS1, M. Polverino MD2, F. D’Amico MD3, E. D’Elia, MD PhD4, A. Agarossi MD5, S. Agati MD6, E. Agosteo MD7, F. Ando’ MD8, M. Andreoni MD9, IF. Angelillo DDS MPH10, G. Arcoleo MD11, C. Arena MD12, P. Baiamonte MD11, E. Balestro MD13, L. Ball MD, PhD14, P. Banfi MD15, G. Bartoletti MD16, R. Bartolotta RN17, M. Bassetti MD PhD14, D. Battaglini MD14, M. Bellan MD PhD18, I. Benzoni MD PhD19, R. Bertolini MD20, M. Bevilacqua MD21, M. Bezzi22 MD, A. Bianco MD23, A. Bisbano MD24,F. Bobbio MD18, G. Bocchialini MD22, F. Bonetti MD20, F. Boni MD25, M. Bonifazi MD26, G. Borgonovo MD25, S. Borre’ MD27, M. Bosio MD28, G. Brachini MD29, I. Brunetti MD14, L. Calagna3, F. Calò10, M. Candelli MD PhD30, A. Capuozzo MD2, T. Carr MD1, A. Castellani MD22, F. Catalano MD PhD11, G. Catania MD31, E. Catena MD5, M. Cattaneo32, A. Cattelan MD13, V. Ceruti MD21, F. Chiumiento MD32, G. Cicchitto MD2, B. Cirillo MD29, M. Confalonieri MD34, P. Confalonieri MD34, M. Contoli MD PhD35, N. Coppola MD PhD10, A. Corsico MD28, R. Cosentina MD3, R. Costantino MD36, C. Crimi MD PhD37, A. Currà MD38, M. D’Abbraccio MD39, A. Dalbeni MD21, F. Daleffe MD22, R. Davide MD40, M. Del Donno MD41, F. Di Marco, MD PhD42, F. Di Pastena MD43, F. Di Perna MD44, Z. Di Rosa MD45, A. Di Sabatino MD28, O. Elesbani MD40, D. Elia MD32, V. Esposito MD PhD46, L. Fabiani MD47, G. Falco MD25, G. Falo MD35, C. Fanelli MD48, A. Fantin MD49, F. Ferrigno MD50, G. Fiorentino MD46, F. Franceschi MD PhD30, M. Fronza MD51, G. Gardini Gardenghi MD40, S. Gasparini MD26, D.R. Giacobbe MD14, C. Giannotti MD5, G. Giannotti MD19, A. Gidari MD52, F. Giovanardi MD PhD25, P. Gnerre MD31, F. Gonnelli MD26, M. Graziano MD53, S. Greco MD47, A. Grosso PhD28, S. Guarino MD32, S. Guerra MD PhD1,S. Harari MD32, A. Iannarelli MD54,P. Imitazione MD39, F. Inglese MD55, V. Iodice MD46, A. Izzo MD43, C. La Greca MD16, M. Kraft MD1, A. Lax MD15, F. Legittimo MD20, A. Leo MD56, S. Leone MD53, V. Lepidini MD9, M. Leto RN36, F. Licata MD23, F. Locati MD3, L. Lorini MD4, B. Lucchetti MD20, I. Maida MD48, M. Macera MD10, E. Manzillo MD46, A. March MD49, D. Mascheroni MD57, A. Mastroianni MD17, I. Mauro MD2, M. Mazzitelli MD23, E. Mazzuca MD11, L. Mennella MD16, C. Micheletto MD12, A. Mingoli MD29, P. Minuz MD21, M. Moioli MD14, L. Monti MD57, R. Morgagni, MD PhD9, L. Mucci MD58, M. Muselli MD47, S. Negri MD6, C.G.A. Nobile MD59, S. Oldani MD60, C. Olivieri MD27, A. Papi MD35, G. Parati MD61, L. Parodi MD31, R. Parrella MD PhD46, E. Pastorelli MD27, V. Patruno MD49, F. Pellegrino MD7, P. Pelosi MD FERS14, M.F. Pengo, MD PhD61, D. Pepe MD23, A. Perotti MD5, R. Petrino MD27, M. Petrucci MD30, R.M. Piane MD16, G. Pignataro MD PhD30, M. Pino MD23, M. Pirisi MD18, V. Poletti MD60, F. Porru MD62, F. Pugliese MD29, R. Punzi MD46, D.A. Ramaroli MD12, C. Robba MD PhD14, R. Rostagno MD27, G. Ruocco MD63, U. Sabatini MD28, P.P. Sainaghi MD PhD18, F. Salton MD34, C. Salzano MD64, A. Sanduzzi MD39, S. Sanduzzi Zamparelli MD10,V. Sangiovanni MD46, D. Santopuoli MD45, P. Sapienza MD29, L. Sarmati MD9, E. Schiaroli MD65, F. Scienza MD27, M. Senni MD4, L. Serchisu PhD51, S. Sgherzi MD57, D. Soddu MD18, D. Soranna MD61, C. Sorino MD PhD6, S. Spadaro MD35, E. Stirpe MD49, C. Tana MD58, S. Tardivo MD12, S. Tartaglia MD27, E. Teopompi MD20, R. Terribile MD27, M. Tomchaney1, E. Torelli MD30, C. Torlasco MD61, C. Torti MD23, E. Tupputi MD56, C. Ugolinelli MD5, A. Vatrella MD67, A.G. Versace MD8, M. Villani MD67, L. Vincenzo MD40, C.A. Volta MD35, N. Voraphani MD1, J.C. Woods PhD68, E. Zekaj MD69, R. Zoppellari MD35, F.D. Martinez MD1

1. Asthma and Airway Disease Research Center, University of Arizona
2. Ospedale Scarlato, Scafati
3. ASST Bergamo Est, Seriate
4. ASST Papa Giovanni XXIII, Bergamo
5. Ospedale Sacco, Milano
6. ASST Lariana, Ospedale Sant'Anna di Como
7. Clinica San Carlo- Paderno Dugnano, Milano
8. Policlinico di Messina, Messina
9. Policlinico Universitario Tor Vergata, Roma
10. Università Vanvitelli, Napoli
11. A.O.O.R. Villa Sofia Cervello, Palermo
12. Università di Verona, Verona
13. Azienda Ospedaliera Universitaria di Padova, Padova
14. Policlinico San Martino and Universita’ di Genova, Genova
15. IRCCS Fondazione Don Carlo Gnocchi, Milano
16. Azienda USL Toscana Nord Ovest, Ospedale di Lucca
17. Azienda Ospedaliera di Cosenza, Cosenza
18. AOU Maggiore della Carità and Università del Piemonte Orientale UPO, Novara, Italy
19. Ospedale di Cremona, Cremona
20. AUSL-IRCCS RE Ospedale di Guastalla
21. Policlinico GB Rossi, Verona
22. Spedali Civili di Brescia, Brescia
23. Università degli studi Magna Graecia, Catanzaro
24. Ospedale San Giovanni di Dio, Crotone
25. AUSL-IRCCS, Reggio Emilia
26. Polytechnic University of Marche Region, Azienda Ospedali Riuniti, Ancona
27. Ospedale S Andrea, Vercelli
28. IRCCS Policlinico San Matteo Foundation, Pavia
29. Universita La Sapienza, Roma
30. Fondazione Universitaria Policlinico Gemelli - IRCCS. Università Cattolica del Sacro Cuore di Roma, Roma
31. Ospedale San Paolo, Savona
32. Ospedale San Giuseppe MultiMedica IRCCS- Milano
33. Ospedale di Eboli, Eboli
34. Ospedale di Trieste, Trieste
35. Universita' di Ferrara, Ferrara
36. Azienda Ospedaliera Pugliese Ciaccio, Catanzaro
37. Azienda Ospedaliera Universitaria Policlinico-Vittorio Emanuele, Catania
38. Ospedale Giulio Jazzolino, Vibo Valentia
39. Ospedale Monaldi and Federico II University, Napoli
40. ASST del Garda, Ospedale di Desenzano del Garda
41. Ospedale Rummo, Benevento
42. ASST Papa Giovanni XXIII, Bergamo, and University of Milan
43. Ospedale Dono Svizzero, Formia
44. Ospedale di Caserta, Caserta
45. Ospedale Cardarelli, Campobasso
46. Ospedale Cotugno, Napoli
47. Universita' de L'Aquila
48. Ospedale di Sassari, Sassari
49. Ospedale Universitario di Bolzano
50. ASL Salerno, Scafati
51. Ospedale di Bolzano, Bolzano
52. Ospedale di Perugia, Perugia
53. Azienda Sanitaria Locale and San Giuseppe Moscati Hospital, Avellino
54. Ospedale Santa Maria Goretti, Latina
55. ASST Mantova, Mantova
56. ASL BT. Pneumologia Andria
57. IC Villa Aprica, Gruppo San Donato, Como
58. Ospedale di Pesaro, Pesaro
59. Università della Calabria, Cosenza
60. Ospedale Morgagni, Forli’
61. IRCCS Istituto Auxologico Italiano, Ospedale San Luca, Milano
62. Erasmus MC, Rotterdam
63. Ospedale Regina Montis Regalis, Mondovì, Cuneo
64. Hospital "Buon Consiglio-Fatebenefratelli," Napoli
65. Ospedale di Perugia, Perugia
66. Universita’ di Salerno
67. Ospedale di Crema, Crema
68. Cincinnati Children’s Hospital and University of Cincinnati
69. IRCCS Istituto Ortopedico Galeazzi Milano
